# Supplementary material for: Comparison of the adverse events of anterior cervical disc replacement versus anterior cervical discectomy and fusion: A protocol for a systematic review and meta-analysis of prospective randomized controlled trials
Source: PubMed Central journal article supplement (PMC5916681; doi:10.1097/md.0000000000010015), 2018-04-20
Supplement: medi-97-e0015-s001.pdf [file medi-97-e0015-s001.pdf]

## Comparison of the adverse events of anterior cervical disc replacement versus anterior cervical discectomy and fusion

### Citation

Comparison of the adverse events of anterior cervical disc replacement versus anterior cervical discectomy and fusion. PROSPERO 2017 CRD42017083240 Available from:  
[http://www.crd.york.ac.uk/PROSPERO/display\\_record.php?ID=CRD42017083240](http://www.crd.york.ac.uk/PROSPERO/display_record.php?ID=CRD42017083240)

### Review question

1. Our current research aims to compare adverse events between artificial cervical disc replacement and anterior cervical discectomy and fusion.
2. To evaluate which surgical procedure is more safety for the treatment of cervical spondylosis.
3. Vital evidence-based guidance will be provided for spine surgeons and designers to evaluation of prognosis and improvement of dynamic devices.

### Searches

The electric database of PubMed, MEDLINE, Embase, Google Scholar and The Cochrane Library will be systematically searched without language restriction in Dec. 2017 by 2 independent authors.

The keywords will be defined as follows: anterior cervical disc replacement, cervical disc arthroplasty, cervical dynamic device, cervical artificial disc; anterior cervical decompression and fusion, anterior interbody fusion; randomized controlled trial, randomized trial, and controlled clinical trial; the keywords will be combined with Boolean operators of AND, OR, and NOT.

A search strategy developed with comprehensive use of keywords is shown. Related articles listed in previous systematic reviews, meta-analysis, and other clinical research articles will be manually searched to avoid original misses.

### Types of study to be included

Only randomized controlled trials with no limits on language, date or form of publication.

### Condition or domain being studied

Cervical degenerative disc diseases are common in spinal disorders, and features with neck and arm pain, sometimes, associated with numbness of upper limbs, loss of function. The therapeutic methods include nonoperation, anterior cervical discectomy and fusion (ACDF), Anterior cervical disc replacement (ACDR), and others.

### Participants/population

Patients who suffered from cervical spondylosis were required surgical intervention, either ACDR or ACDF.

### Intervention(s), exposure(s)

Any anterior artificial device that was used to perform the ACDR will be included, such as ProDisc-C, Prestige disc, Bryan disc, KineflexIC, Modic-C, and PCM. The control group was treated by standard ACDF.

### Comparator(s)/control

A control group (ACDF) is required.

### Primary outcome(s)

- (1) Adjacent segment degeneration (ASD)
- (2) Subsequent Surgical Intervention
- (3) Gastrointestinal

### Secondary outcome(s)

- (1) Dysphagia/dysphonia
- (2) Neck /or arm pain
- (3) Neurological

### Data extraction (selection and coding)

#### Risk of bias (quality) assessment

The risk of bias of the included studies will be assessed according to the Furlan checklist, which includes 7 items: (A) Was the method of randomization adequate? (B) as the treatment allocation concealed? (C) Was knowledge of the allocated interventions adequately prevented during the study? (D) Were incomplete outcome data adequately addressed? (E) Are reports of the study free of suggestion of selective outcome reporting? (F) Other sources of potential bias. The overall quality of this systematic review and meta-analysis will be summarized and evaluated with GRADE pro (<http://www.gradepro.org>).

#### Strategy for data synthesis

The meta-analysis will be performed with the statistic software RevMan 5.3 software (Cochrane Collaboration, Oxford, UK). Fixed-effects models ( $I^2 < 50\%$ ) or random-effects models ( $I^2 \geq 50\%$ ) will be chosen according to the heterogeneity of the included articles. For dichotomous outcomes, RR and 95% confidence intervals (CIs) were calculated, For continuous outcomes, weighted mean difference and 95% confidence intervals (CIs) were calculated.

#### Analysis of subgroups or subsets

Subgroup meta-analysis will be performed on articles from different countries, patients with 1 or 2 or more pathological segments, different cervical artificial discs and different follow-ups. Other factors such as age, gender, and race will also be conducted.

#### Contact details for further information

He Zhao  
zhaohebu@cm.sina.com

#### Organisational affiliation of the review

Department of Orthopedics III, Dongzhimen Hospital Affiliated to Beijing University of Chinese Medicine

#### Anticipated or actual start date

10 December 2017

#### Anticipated completion date

31 January 2018

#### Funding sources/sponsors

National 12th five-year science and technology support plan (2012BAI18B05).

#### Conflicts of interest

#### Language

**PROSPERO**  
International prospective register of systematic reviews

English

**Country**

China

**Stage of review**

Review\_Ongoing

**Subject index terms status**

Subject indexing assigned by CRD

**Subject index terms**

Discectomy; Humans; Total Disc Replacement

**Date of registration in PROSPERO**

20 December 2017

**Date of publication of this version**

20 December 2017

**Details of any existing review of the same topic by the same authors****Stage of review at time of this submission**

| <b>Stage</b>                                                    | <b>Started</b> | <b>Completed</b> |
|-----------------------------------------------------------------|----------------|------------------|
| Preliminary searches                                            | Yes            | No               |
| Piloting of the study selection process                         | No             | No               |
| Formal screening of search results against eligibility criteria | No             | No               |
| Data extraction                                                 | No             | No               |
| Risk of bias (quality) assessment                               | No             | No               |
| Data analysis                                                   | No             | No               |

**Versions**

20 December 2017

**PROSPERO**

This information has been provided by the named contact for this review. CRD has accepted this information in good faith and registered the review in PROSPERO. CRD bears no responsibility or liability for the content of this registration record, any associated files or external websites.
